# Supplementary material for: Snow water equivalent in the Alps as seen by gridded data sets, CMIP5 and CORDEX climate models
Source: Copernicus journal article supplement (doi:10.5194/tc-11-1625-2017), 2017-07-10
Supplement: Supplementary file 1 [file tc-11-1625-2017-supplement.pdf]

Supplement of The Cryosphere, 11, 1625–1645, 2017  
<https://doi.org/10.5194/tc-11-1625-2017-supplement>  
© Author(s) 2017. This work is distributed under  
the Creative Commons Attribution 3.0 License.

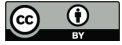

*Supplement of*

## **Snow water equivalent in the Alps as seen by gridded data sets, CMIP5 and CORDEX climate models**

**Silvia Terzago et al.**

*Correspondence to:* Silvia Terzago (s.terzago@isac.cnr.it)

The copyright of individual parts of the supplement might differ from the CC BY 3.0 License.

## ERA-Interim/Land precipitation and snow water equivalent compared to ERA-Interim

ERA-Interim/Land and ERA-Interim snow water equivalent (SNW) climatologies are derived using the ECMWF land surface model HTESSEL, being ERA-Interim/Land the result of *offline* simulation driven by meteorological forcing from the ERA-Interim atmospheric reanalysis and precipitation adjustments based on GPCP v2.1.

- 5 Percent differences of DJFMA precipitation forcing in ERA-Interim/Land with respect to ERA-Interim in the Alpine region are reported in Fig. S1a. ERA-Interim/Land presents a larger precipitation amount over the Alpine range, partially compensating the original ERA-Interim dry bias. The additional precipitation input is reflected in a thicker snowpack, locally exceeding ERA-Interim values by more than  $100 \text{ kg/m}^2$ .

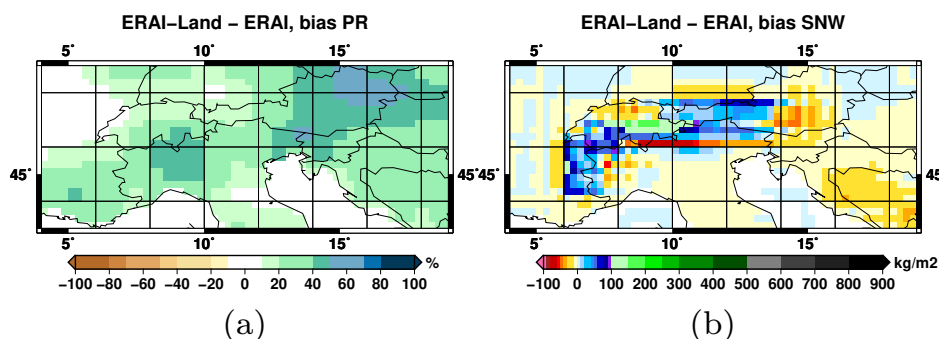

**Figure S1.** a) Percent difference in the multiannual mean (1980-2005) of the DJFMA accumulated precipitation in ERA-Interim/Land with respect to ERA-Interim; (b) Bias of ERA-Interim/Land DJFMA average snow water equivalent climatology (1980-2005) with respect to ERA-Interim.

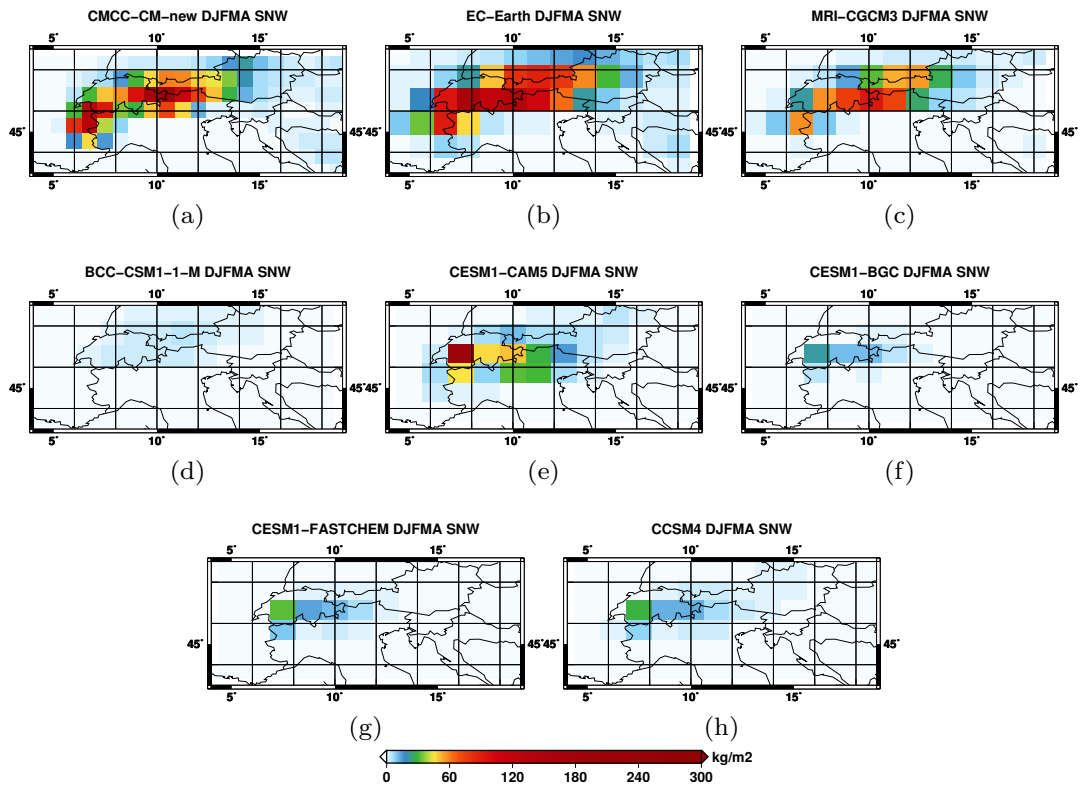

**Figure S2.** Multiannual mean (1980-2005) of the DJFMA SNW for GCMs with spatial resolution equal or finer than 1.25°lon. Out of the 4 CESM-family models (e-h), three (f-h) present very similar SNW patterns.

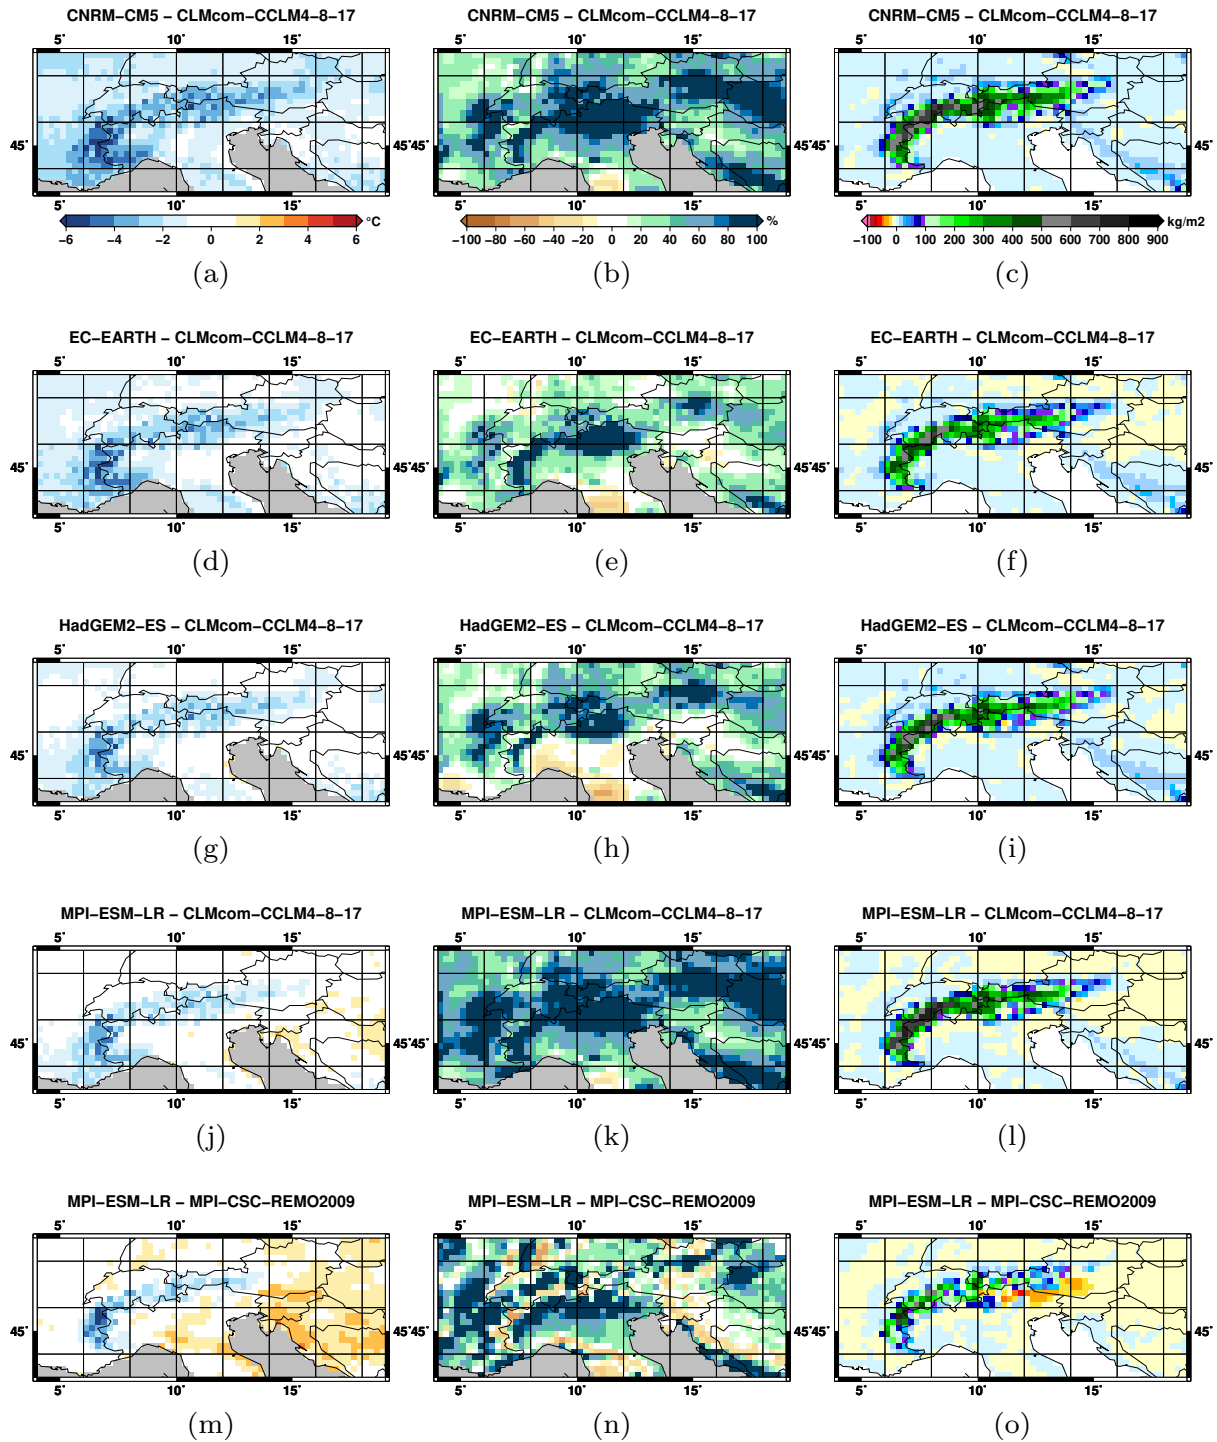

**Figure S3.** Biases of the GCM-driven CCLM4 and REMO2009 DJFMA surface air temperature, precipitation and snow water equivalent climatologies with respect to the reference datasets EOBS and NSIDC Global SNW, over the period 1980-2005.

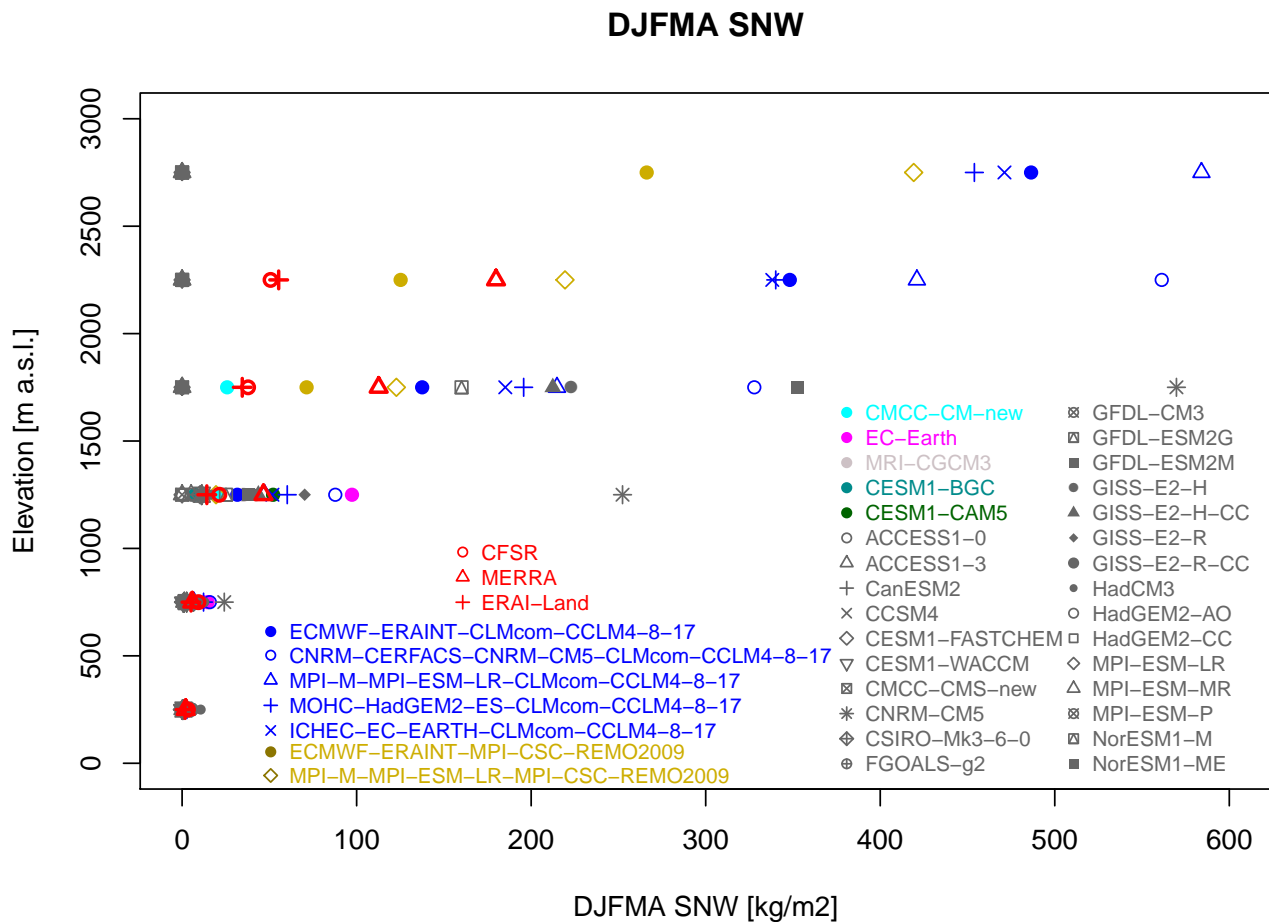

**Figure S4.** DJFMA snow water equivalent climatologies derived from reanalyses, EURO-CORDEX ERA-Interim-driven and GCM-driven RCMs, and CMIP5 GCMs, have been spatially averaged over different elevation ranges 500 meters wide. The elevation is derived from the topography of each reanalysis/climate model.
